# Supplementary material
Source: Springer Nature journal article supplement (https://www.springermedizin.de/resource/supplementary/12985_2013_2545_MOESM1_ESM.pdf/9606942)

**(A)**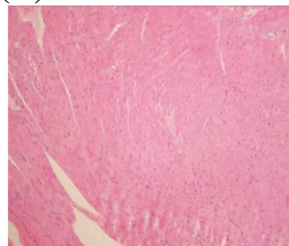

a: Normal control (200×)

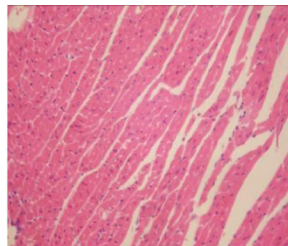

b: 3d (200×)

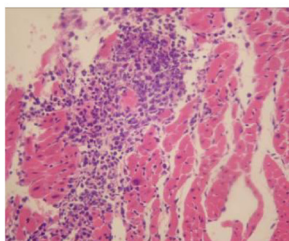

c: 7d (200×)

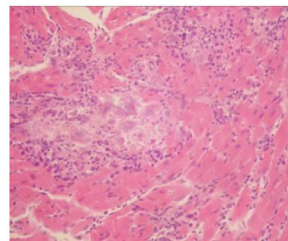

d: 21d (200×)

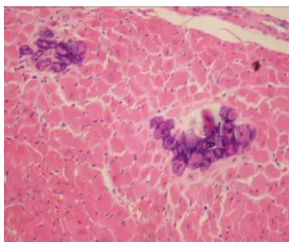

e: 40d (200×)

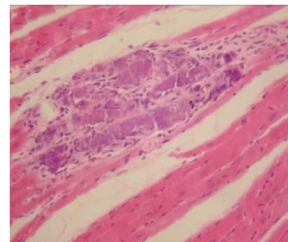

f: 55d (200×)

**(B)**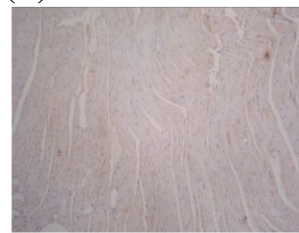

a: Normal control (200×)

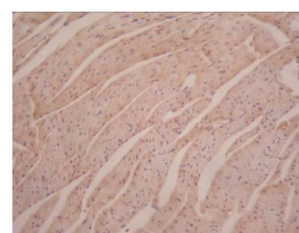

b: 3d (200×)

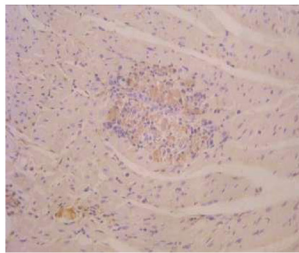

c: 7d (200×)

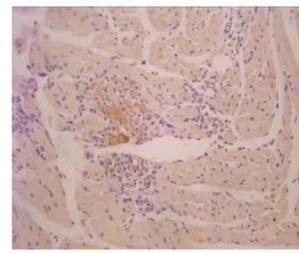

d: 21d (200×)

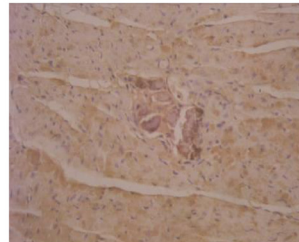

e: 40d (200×)

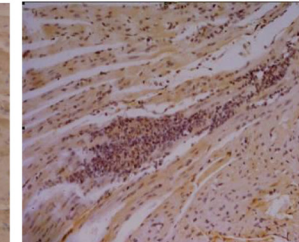

f: 55d (200×)

Supplement: MOESM1 [file 9606942]
